# Supplementary material
Source: PubMed Central journal article supplement (PMC8857307)
Supplement: NIHMS1731691-supplement-Supplemental_Material_1.pdf [file NIHMS1731691-supplement-Supplemental_Material_1.pdf]

**Supplemental Table A: Prevalence of Past-Month PDM/Alcohol Simultaneous Co-Ingestion by Sex or Race/Ethnicity in Young Adults**

|                                            | Males               | Females             | Sex Difference<br>p-value <sup>a</sup> | White (A)           | Black (B)           | Hispanic/<br>Latino (C) | Multiracial<br>(D)  | Race-<br>Ethnicity<br>Comparisons <sup>b</sup> |
|--------------------------------------------|---------------------|---------------------|----------------------------------------|---------------------|---------------------|-------------------------|---------------------|------------------------------------------------|
| <b>Sample Size</b>                         | 26,696              | 28,994              |                                        | 29,846              | 7,812               | 11,667                  | 2,425               |                                                |
|                                            | % (95% CI)          | % (95% CI)          |                                        | % (95% CI)          | % (95% CI)          | % (95% CI)              | % (95% CI)          |                                                |
| <b>Opioid Co-Ingestion</b>                 |                     |                     |                                        |                     |                     |                         |                     |                                                |
| Any Past-Month Opioid PDM                  | 1.8 (1.6-2.0)       | 1.7 (1.6-1.9)       | 0.62                                   | 2.1 (1.9-2.3)       | 1.5 (1.3-1.8)       | 1.6 (1.3-1.9)           | 2.4 (1.7-3.4)       | A > B, D                                       |
| Past-Month Alcohol Co-Ingestion            | 0.6 (0.5-0.7)       | 0.5 (0.4-0.6)       | 0.31                                   | 0.7 (0.6-0.9)       | 0.4 (0.3-0.6)       | 0.4 (0.3-0.5)           | 1.1 (0.6-1.8)       | A, D > C; A > B                                |
| % with PDM engaged in Alcohol Co-Ingestion | 33.8<br>(28.6-39.4) | 31.4<br>(27.3-35.7) | 0.40                                   | 35.1<br>(29.7-40.9) | 29.6<br>(21.6-39.1) | 25.2<br>(18.8-32.8)     | 44.8<br>(30.3-60.4) | no differences                                 |
| <b>Tranquilizer-Sedative Co-Ingestion</b>  |                     |                     |                                        |                     |                     |                         |                     |                                                |
| Any Past-Month Tranquilizer-Sedative PDM   | 1.6 (1.4-1.8)       | 1.4 (1.2-1.6)       | 0.14                                   | 1.9 (1.7-2.0)       | 1.1 (0.8-1.4)       | 1.1 (0.9-1.4)           | 1.6 (1.1-2.3)       | A > B, C                                       |
| Past-Month Alcohol Co-Ingestion            | 0.8 (0.6-0.9)       | 0.6 (0.5-0.7)       | 0.012                                  | 0.8 (0.7-0.9)       | 0.5 (0.4-0.7)       | 0.5 (0.4-0.6)           | 0.8 (0.4-1.3)       | A > B, C                                       |
| % with PDM engaged in Alcohol Co-Ingestion | 48.4<br>(42.0-54.9) | 40.3<br>(34.9-46.1) | 0.052                                  | 44.5<br>(39.2-49.9) | 47.3<br>(36.7-58.1) | 44.1<br>(34.5-54.2)     | 47.7<br>(29.9-66.0) | no differences                                 |
| <b>Stimulant Co-Ingestion</b>              |                     |                     |                                        |                     |                     |                         |                     |                                                |
| Any Past-Month Stimulant PDM               | 2.1 (1.9-2.4)       | 1.9 (1.7-2.1)       | 0.026                                  | 2.9 (2.7-3.1)       | 0.6 (0.4-0.8)       | 0.9 (0.7-1.2)           | 2.7 (2.0-3.6)       | A, D > B, C                                    |
| Past-Month Alcohol Co-Ingestion            | 0.9 (0.7-1.0)       | 0.8 (0.7-0.9)       | 0.20                                   | 1.2 (1.1-1.4)       | 0.1 (0.1-0.3)       | 0.4 (0.3-0.6)           | 1.2 (0.7-2.1)       | A, D > B, C; C > B                             |
| % with PDM engaged in Alcohol Co-Ingestion | 41.5<br>(37.7-45.4) | 42.0<br>(36.5-47.6) | 0.79                                   | 42.4<br>(38.6-46.4) | 26.0<br>(12.8-45.6) | 44.1<br>(35.8-56.1)     | 45.8<br>(27.1-62.7) | no differences                                 |

Data Source: 2015-19 National Survey on Drug Use and Health (NSDUH)

95% CI = 95% confidence interval of the point prevalence estimate.

<sup>a</sup>*p*-values were from logistic models adjusted for age, race/ethnicity, educational status, population density, and household income.

<sup>b</sup>Pairwise comparisons were Bonferroni-corrected for six comparisons, with comparisons only noted when they differ at a *p*-level of 0.0083 or less (i.e.,  $A > B$  indicates that white young adults had significantly higher prevalence rates than black young adults). The post hoc comparisons were based on logistic models adjusted for age, sex, educational status, population density, and household income.
