# Supplementary material
Source: PubMed Central journal article supplement (PMC8857307)
Supplement: NIHMS1731691-supplement-Supplemental_Material_2.pdf [file NIHMS1731691-supplement-Supplemental_Material_2.pdf]

**Supplemental Table B: Prevalence of Past-Month PDM/Alcohol Simultaneous Co-Ingestion by Educational Status in Young Adults**

|                                                       | HS Student<br>(A)   | College<br>Student (B) | College<br>Graduate (C) | HS Graduate<br>(D)  | Less than HS<br>(E) | Pairwise<br>Comparisons <sup>a</sup> |
|-------------------------------------------------------|---------------------|------------------------|-------------------------|---------------------|---------------------|--------------------------------------|
| <b>Sample Size</b>                                    | 3,942               | 21,166                 | 9,106                   | 28,927              | 6,775               |                                      |
|                                                       | % (95% CI)          | % (95% CI)             | % (95% CI)              | % (95% CI)          | % (95% CI)          |                                      |
| <b>Opioid Co-Ingestion</b>                            |                     |                        |                         |                     |                     |                                      |
| Any Opioid PDM                                        | 1.4 (1.1-2.0)       | 1.3 (1.2-1.6)          | 0.8 (0.6-1.0)           | 2.3 (2.1-2.6)       | 2.7 (2.2-3.2)       | D, E > B > C;<br>A > C               |
| Opioid PDM with Alcohol Co-Ingestion                  | 0.4 (0.2-0.7)       | 0.4 (0.3-0.6)          | 0.2 (0.1-0.4)           | 0.8 (0.7-0.9)       | 0.8 (0.5-1.2)       | D, E > C                             |
| % with Past-Month PDM engaged in Alcohol Co-Ingestion | 26.0<br>(14.8-41.7) | 32.2<br>(24.2-41.6)    | 30.2<br>(20.7-41.7)     | 34.3<br>(29.7-39.3) | 30.4<br>(22.3-39.9) | no differences                       |
|                                                       | % (95% CI)          | % (95% CI)             | % (95% CI)              | % (95% CI)          | % (95% CI)          |                                      |
| <b>Tranquilizer-Sedative Co-Ingestion</b>             |                     |                        |                         |                     |                     |                                      |
| Any Tranquilizer-Sedative PDM                         | 1.2 (0.9-1.6)       | 1.3 (1.1-1.5)          | 1.1 (0.9-1.5)           | 1.7 (1.5-1.9)       | 2.3 (1.8-2.8)       | E > A, B, C, D;<br>D > C             |
| Tranquilizer-Sedative PDM with Alcohol Co-Ingestion   | 0.6 (0.3-0.9)       | 0.7 (0.5-0.8)          | 0.5 (0.3-0.7)           | 0.7 (0.6-0.8)       | 0.9 (0.6-1.3)       | no differences                       |
| % with Past-Month PDM engaged in Alcohol Co-Ingestion | 48.9<br>(32.8-65.3) | 52.8<br>(43.7-61.8)    | 43.2<br>(29.1-58.5)     | 41.0<br>(35.9-46.3) | 39.3<br>(29.7-49.7) | no differences                       |
|                                                       | % (95% CI)          | % (95% CI)             | % (95% CI)              | % (95% CI)          | % (95% CI)          |                                      |
| <b>Stimulant Co-Ingestion</b>                         |                     |                        |                         |                     |                     |                                      |
| Any Stimulant PDM                                     | 1.1 (0.7-1.6)       | 2.6 (2.3-2.9)          | 2.8 (2.3-3.3)           | 1.6 (1.4-1.8)       | 1.4 (1.1-1.8)       | B, C > A, D, E                       |
| Stimulant PDM with Alcohol Co-Ingestion               | 0.3 (0.1-0.7)       | 1.0 (0.8-1.2)          | 1.3 (1.1-1.7)           | 0.7 (0.5-0.8)       | 0.5 (0.3-0.8)       | B, C > D                             |
| % with Past-Month PDM engaged in Alcohol Co-Ingestion | 32.0 (15.1-55.5)    | 38.8<br>(33.0-45.0)    | 48.6<br>(41.2-56.1)     | 43.0<br>(36.9-49.3) | 36.7<br>(25.7-49.8) | no differences                       |

Data Source: 2015-19 National Survey on Drug Use and Health (NSDUH)

HS = High School; 95% CI = 95% confidence interval of the point prevalence estimate

<sup>a</sup>Pairwise comparisons were Bonferroni-corrected for 10 comparisons, with comparisons only noted when they differ at a  $p$ -level of 0.005 or less (i.e.,  $A > C$  indicates that young adults in high school had significantly higher prevalence rates than college graduates). The post hoc comparisons were based on logistic models adjusted for age, race/ethnicity, sex, population density, and household income.
